# Supplementary material for: Influence of the Feedstock on the Process Parameters, Product Composition and Pilot-Scale Cracking of Plastics
Source: MDPI journal article supplement (doi:10.3390/ma14113094), 2021-06-04
Supplement: s1 [file s1]

Supplementary materials

# Influence of the Feedstock on the Process Parameters, Product Composition and Pilot-Scale Cracking of Plastics

Daria Frączak <sup>1,\*</sup>, Grażyna Fabiś <sup>1</sup> and Beata Orlńska <sup>2</sup>

<sup>1</sup> Clariter Poland Sp. z o.o., 59A Żelazna Str., 00-848 Warszawa, Poland; info@clariter.com

<sup>2</sup> Department of Organic Chemical Technology and Petrochemistry, Silesian University of Technology, 4B Krzywoustego Str., 44-100 Gliwice, Poland; beata.orkinska@polsl.pl

\* Correspondence: daria.fraczak@clariter.com; Tel.: +48-(512)-604-600

**Table S1.** PE cracking product detailed composition (Sample 1).

| RT, min | %wt. | Component name         | MW, Da | Structure |
|---------|------|------------------------|--------|-----------|
| 3.204   | 1.48 | 1-HEPTENE              | 98     | C7H14     |
| 3.324   | 2.43 | HEPTANE                | 100    | C7H16     |
| 5.655   | 1.32 | 1-OCTENE               | 112    | C8H16     |
| 5.98    | 2.12 | OCTANE                 | 114    | C8H18     |
| 8.121   | 0.80 | 2,4-DIMETHYLHEPT-1-ENE | 126    | C9H18     |
| 11.527  | 1.16 | 1-NONENE               | 126    | C9H18     |
| 12.007  | 1.94 | NONANE                 | 128    | C9H20     |
| 16.314  | 2.43 | 1-DECENE               | 140    | C10H20    |
| 16.634  | 3.01 | DECANE                 | 142    | C10H22    |
| 19.73   | 2.54 | 1-UNDECENE             | 154    | C11H22    |
| 19.975  | 3.72 | UNDECANE               | 156    | C11H24    |
| 22.521  | 2.44 | 1-DODECENE             | 168    | C12H24    |
| 22.731  | 3.84 | DODECANE               | 170    | C12H26    |
| 24.987  | 2.21 | 1-TRIDECENE            | 182    | C13H26    |
| 25.167  | 3.63 | TRIDECANE              | 184    | C13H28    |
| 27.238  | 2.36 | 1-TETRADECENE          | 196    | C14H28    |
| 27.398  | 3.83 | TETRADECANE            | 198    | C14H30    |
| 29.334  | 1.96 | 1-PENTADECENE          | 210    | C15H30    |
| 29.479  | 3.90 | PENTADECANE            | 212    | C15H32    |
| 31.305  | 1.83 | CETENE                 | 224    | C16H32    |
| 31.44   | 4.17 | HEXADECANE             | 226    | C16H34    |
| 33.171  | 1.73 | 1-HEPTADECENE          | 238    | C17H34    |
| 33.291  | 4.12 | HEPTADECANE            | 240    | C17H36    |
| 34.941  | 1.55 | 3-OCTADECENE, (E)-     | 252    | C18H36    |
| 35.051  | 4.03 | OCTADECANE             | 254    | C18H38    |
| 35.126  | 0.36 | 5-OCTADECENE, (E)-     | 252    | C18H36    |
| 36.622  | 1.33 | 1-NONADECENE           | 266    | C19H38    |
| 36.722  | 3.95 | NONADECANE             | 268    | C19H40    |
| 38.228  | 1.10 | 3-EICOSENE, (E)-       | 280    | C20H40    |
| 38.323  | 3.54 | EICOSANE               | 282    | C20H42    |
| 39.763  | 0.97 | 3-HENEICOSENE, (E)-    | 294    | C21H42    |
| 39.848  | 3.34 | HENEICOSANE            | 296    | C21H44    |
| 41.234  | 0.83 | 9-DOCOSENE             | 308    | C22H44    |
| 41.309  | 3.14 | DOCOSANE               | 310    | C22H46    |
| 42.64   | 0.60 | 1-TRICOSENE            | 322    | C23H46    |
| 42.71   | 2.77 | TRICOSANE              | 324    | C23H48    |
| 43.995  | 0.62 | 9-TRICOSENE, (Z)-      | 322    | C23H46    |
| 44.055  | 2.67 | TETRACOSANE            | 338    | C24H50    |

|        |       |                 |     |        |
|--------|-------|-----------------|-----|--------|
| 45.351 | 2.44  | PENTACOSANE     | 352 | C25H52 |
| 46.601 | 2.10  | HEXACOSANE      | 366 | C26H54 |
| 47.807 | 1.76  | HEPTACOSANE     | 380 | C27H56 |
| 48.977 | 1.46  | OCTACOSANE      | 394 | C28H58 |
| 50.112 | 1.12  | NONACOSANE      | 408 | C29H60 |
| 51.218 | 0.80  | TRIACONTANE     | 422 | C30H62 |
| 52.308 | 0.55  | HENTRIACONTANE  | 436 | C31H64 |
|        | 70.39 | N-PARAFFINS     |     |        |
|        | 28.81 | N-OLEFINS       |     |        |
|        | 0.00  | ISO-PARAFFINS   |     |        |
|        |       | ISO-OLEFINS     |     |        |
| 0.80   |       | CYCLO-PARAFFINS |     |        |
|        | 0.00  | CYCLO-OLEFINS   |     |        |
|        | 0.00  | AROMATICS       |     |        |

Table S2. PP cracking product detailed composition (Sample 2).

| RT, min | %wt. | Component name                     | MW, Da | Structure |
|---------|------|------------------------------------|--------|-----------|
| 2.709   | 0.27 | 1-PENTENE, 2,4-DIMETHYL-           | 98     | C7H14     |
| 2.803   | 0.39 | 2,4-DIMETHYL 1,4-PENTADIENE        | 96     | C7H12     |
| 4.897   | 0.23 | TRANS-1-BUTYL-2-METHYLCYCLOPROPANE | 112    | C8H16     |
| 5.21    | 1.74 | HEPTANE, 4-METHYL-                 | 114    | C8H18     |
| 7.077   | 0.50 | 2,2-DIMETHYL-3-HEPTENE TRANS       | 126    | C9H18     |
| 7.704   | 0.23 | HEPTANE, 2,4-DIMETHYL-             | 128    | C9H20     |
| 8.311   | 0.83 | CYCLOHEXANE, 1,3,5-TRIMETHYL-      | 126    | C9H18     |
| 8.365   | 0.40 | CYCLOHEXANE, 1,2,5-TRIMETHYL-      | 126    | C9H18     |
| 8.951   | 5.88 | 2,2-DIMETHYL-2-HEPTENE-            | 126    | C9H18     |
| 8.985   | 7.76 | 2,4-DIMETHYL-1-HEPTENE             | 126    | C9H18     |
| 9.992   | 1.38 | CYCLOHEXANE, 1,4,5-TRIMETHYL-      | 126    | C9H18     |
| 12.366  | 0.58 | ISOPARAFFIN                        |        |           |
| 16.901  | 0.31 | ISOOLEFIN/CYCLOPARAFFIN            |        |           |
| 17.468  | 1.33 | HEPTANE, 3,3,5-TRIMETHYL-          | 142    | C10H22    |
| 17.614  | 1.35 | HEPTANE, 3,2,5-TRIMETHYL-          | 142    | C10H22    |
| 19.115  | 0.30 | ISOOLEFIN/CYCLOPARAFFIN            |        |           |
| 19.221  | 0.33 | ISOOLEFIN/CYCLOPARAFFIN            |        |           |
| 19.722  | 4.57 | ISOOLEFIN/CYCLOPARAFFIN            |        |           |
| 19.848  | 4.29 | ISOOLEFIN/CYCLOPARAFFIN            |        |           |
| 21.729  | 0.82 | ISOOLEFIN/CYCLOPARAFFIN            |        |           |
| 22.076  | 0.59 | ISOOLEFIN/CYCLOPARAFFIN            |        |           |
| 22.496  | 0.42 | ISOOLEFIN/CYCLOPARAFFIN            |        |           |
| 23.189  | 0.44 | ISOOLEFIN/CYCLOPARAFFIN            |        |           |
| 23.923  | 0.43 | ISOPARAFFIN                        |        |           |
| 24.136  | 0.44 | ISOPARAFFIN                        |        |           |
| 24.843  | 0.37 | ISOOLEFIN/CYCLOPARAFFIN            |        |           |
| 25.41   | 0.36 | ISOPARAFFIN                        |        |           |
| 25.577  | 7.56 | ISOOLEFIN/CYCLOPARAFFIN            |        |           |
| 25.777  | 5.37 | ISOOLEFIN/CYCLOPARAFFIN            |        |           |
| 25.964  | 7.07 | ISOOLEFIN/CYCLOPARAFFIN            |        |           |
| 26.557  | 0.33 | ISOOLEFIN/CYCLOPARAFFIN            |        |           |
| 27.131  | 0.99 | ISOOLEFIN/CYCLOPARAFFIN            |        |           |
| 27.297  | 0.21 | ISOOLEFIN/CYCLOPARAFFIN            |        |           |
| 27.504  | 0.32 | ISOOLEFIN/CYCLOPARAFFIN            |        |           |
| 28.951  | 0.36 | ISOPARAFFIN                        |        |           |
| 29.325  | 0.34 | ISOPARAFFIN                        |        |           |

|        |      |                         |
|--------|------|-------------------------|
| 29.498 | 0.43 | ISOOLEFIN/CYCLOPARAFFIN |
| 30.172 | 2.23 | ISOOLEFIN/CYCLOPARAFFIN |
| 30.365 | 1.68 | ISOOLEFIN/CYCLOPARAFFIN |
| 30.505 | 0.72 | ISOOLEFIN/CYCLOPARAFFIN |
| 30.525 | 0.76 | ISOOLEFIN/CYCLOPARAFFIN |
| 30.719 | 2.04 | ISOOLEFIN/CYCLOPARAFFIN |
| 30.912 | 1.40 | ISOOLEFIN/CYCLOPARAFFIN |
| 31.005 | 0.17 | ISOOLEFIN/CYCLOPARAFFIN |
| 31.552 | 1.24 | ISOOLEFIN/CYCLOPARAFFIN |
| 31.726 | 0.24 | ISOOLEFIN/CYCLOPARAFFIN |
| 32.059 | 0.46 | ISOOLEFIN/CYCLOPARAFFIN |
| 34.166 | 2.97 | ISOOLEFIN/CYCLOPARAFFIN |
| 34.333 | 1.05 | ISOOLEFIN/CYCLOPARAFFIN |
| 34.487 | 0.86 | ISOOLEFIN/CYCLOPARAFFIN |
| 34.68  | 2.89 | ISOOLEFIN/CYCLOPARAFFIN |
| 34.807 | 0.80 | ISOOLEFIN/CYCLOPARAFFIN |
| 34.82  | 0.79 | ISOOLEFIN/CYCLOPARAFFIN |
| 35.047 | 0.76 | ISOOLEFIN/CYCLOPARAFFIN |
| 35.234 | 1.93 | ISOOLEFIN/CYCLOPARAFFIN |
| 35.42  | 1.27 | ISOOLEFIN/CYCLOPARAFFIN |
| 35.9   | 0.41 | ISOOLEFIN/CYCLOPARAFFIN |
| 37.728 | 1.35 | ISOOLEFIN/CYCLOPARAFFIN |
| 37.854 | 0.52 | ISOOLEFIN/CYCLOPARAFFIN |
| 37.988 | 0.36 | ISOOLEFIN/CYCLOPARAFFIN |
| 38.161 | 0.88 | ISOOLEFIN/CYCLOPARAFFIN |
| 38.301 | 0.47 | ISOOLEFIN/CYCLOPARAFFIN |
| 38.528 | 0.32 | ISOOLEFIN/CYCLOPARAFFIN |
| 38.881 | 1.53 | ISOOLEFIN/CYCLOPARAFFIN |
| 39.068 | 0.27 | ISOOLEFIN/CYCLOPARAFFIN |
| 39.288 | 0.37 | ISOOLEFIN/CYCLOPARAFFIN |
| 40.955 | 1.13 | ISOOLEFIN/CYCLOPARAFFIN |
| 41.316 | 1.18 | ISOOLEFIN/CYCLOPARAFFIN |
| 41.496 | 0.63 | ISOOLEFIN/CYCLOPARAFFIN |
| 42.016 | 1.88 | ISOOLEFIN/CYCLOPARAFFIN |
| 42.363 | 0.46 | ISOOLEFIN/CYCLOPARAFFIN |
| 42.529 | 0.40 | ISOOLEFIN/CYCLOPARAFFIN |
| 43.91  | 0.58 | ISOOLEFIN/CYCLOPARAFFIN |
| 44.223 | 0.39 | ISOOLEFIN/CYCLOPARAFFIN |
| 44.903 | 0.96 | ISOOLEFIN/CYCLOPARAFFIN |
| 46.631 | 0.44 | ISOOLEFIN/CYCLOPARAFFIN |
| 46.917 | 0.33 | ISOOLEFIN/CYCLOPARAFFIN |
| 47.564 | 0.77 | ISOOLEFIN/CYCLOPARAFFIN |
| 50.065 | 0.56 | ISOOLEFIN/CYCLOPARAFFIN |
|        | 0.00 | N-PARAFFINS             |
|        | 0.00 | N-OLEFINS               |
|        | 6.83 | ISO-PARAFFINS           |
|        |      | ISO-OLEFINS             |
| 93.17  |      | CYCLO-PARAFFINS         |
|        | 0.00 | CYCLO-OLEFINS           |
|        | 0.00 | AROMATICS               |

Table S3. PE/PP 75/25 cracking product detailed composition (Sample 3).

| RT, min | %wt. | Component name                                          | MW, Da | Structure |
|---------|------|---------------------------------------------------------|--------|-----------|
| 3.204   | 1.53 | 1-HEPTENE                                               | 98     | C7H14     |
| 3.329   | 2.49 | HEPTANE                                                 | 100    | C7H16     |
| 3.399   | 0.30 | 2,3-DIMETHYL-1-HEXENE                                   | 112    | C8H16     |
| 4.839   | 2.35 | HEPTANE, 4-METHYL-                                      | 114    | C8H18     |
| 5.67    | 1.22 | 1-OCTENE                                                | 112    | C8H16     |
| 5.99    | 1.83 | OCTANE                                                  | 114    | C8H18     |
| 7.57    | 0.74 | CYCLOHEXANE, 1,3,5-TRIMETHYL-                           | 126    | C9H18     |
| 8.026   | 6.04 | 2,4-DIMETHYL-1-HEPTENE                                  | 126    | C9H18     |
| 8.996   | 0.84 | CYCLOHEXANE, 1,2,4-TRIMETHYL-, (1.ALPHA,2.BETA,4.BETA)- | 126    | C9H18     |
| 11.537  | 1.04 | 1-NONENE                                                | 126    | C9H18     |
| 12.017  | 1.61 | NONANE                                                  | 128    | C9H20     |
| 16.314  | 2.07 | 1-DECENE                                                | 140    | C10H20    |
| 16.639  | 2.39 | DECANE                                                  | 142    | C10H22    |
| 16.939  | 0.84 | OCTANE, 3,3-DIMETHYL-                                   | 142    | C10H22    |
| 17.094  | 0.99 | NONANE, 2,6-DIMETHYL-                                   | 156    | C11H24    |
| 19.285  | 1.78 | OCTANE, 2,3,6-TRIMETHYL-                                | 156    | C11H24    |
| 19.42   | 1.51 | 5-ETHYL-1-NONENE                                        | 154    | C11H22    |
| 19.73   | 2.17 | 1-UNDECENE                                              | 154    | C11H22    |
| 19.975  | 2.90 | UNDECANE                                                | 156    | C11H24    |
| 22.521  | 2.10 | 1-DODECENE                                              | 168    | C12H24    |
| 22.731  | 3.04 | DODECANE                                                | 170    | C12H26    |
| 24.982  | 1.86 | 1-TRIDECENE                                             | 182    | C13H26    |
| 25.167  | 2.94 | TRIDECANE                                               | 184    | C13H28    |
| 25.227  | 2.67 | 1-UNDECENE, 7-METHYL-                                   | 168    | C12H24    |
| 25.422  | 1.09 | 1-UNDECENE, 4-METHYL-                                   | 168    | C12H24    |
| 25.612  | 2.31 | 1-UNDECENE, 4-METHYL-                                   | 168    | C12H24    |
| 27.233  | 2.00 | 1-TETRADECENE                                           | 196    | C14H28    |
| 27.393  | 2.97 | TETRADECANE                                             | 198    | C14H30    |
| 29.329  | 1.63 | 1-PENTADECENE                                           | 210    | C15H30    |
| 29.474  | 3.00 | PENTADECANE                                             | 212    | C15H32    |
| 29.849  | 0.59 | CYCLOHEXANE, 2,4-DIISOPROPYL-1,1-DIMETHY                | 196    | C14H28    |
| 30.389  | 0.35 | CYCLOHEXANE, 1,5-DIISOPROPYL-2,3-DIMETHY                | 196    | C14H28    |
| 31.3    | 1.52 | CETENE                                                  | 224    | C16H32    |
| 31.435  | 3.09 | HEXADECANE                                              | 226    | C16H34    |
| 33.166  | 1.43 | 1-HEPTADECENE                                           | 238    | C17H34    |
| 33.286  | 2.84 | HEPTADECANE                                             | 240    | C17H36    |
| 34.351  | 0.49 | ISOOLEFIN/CYCLOPARAFFIN                                 |        |           |
| 34.936  | 1.39 | 3-OCTADECENE, (E)-                                      | 252    | C18H36    |
| 35.046  | 2.74 | OCTADECANE                                              | 254    | C18H38    |
| 35.116  | 0.44 | ISOOLEFIN/CYCLOPARAFFIN                                 |        |           |
| 36.617  | 1.08 | 1-NONADECENE                                            | 266    | C19H38    |
| 36.722  | 2.67 | NONADECANE                                              | 268    | C19H40    |
| 38.223  | 0.95 | 3-EICOSENE, (E)-                                        | 280    | C20H40    |
| 38.318  | 2.49 | EICOSANE                                                | 282    | C20H42    |
| 39.758  | 0.76 | 3-HENEICOSENE, E)-                                      | 294    | C21H42    |
| 39.843  | 2.34 | HENEICOSANE                                             | 296    | C21H44    |
| 41.229  | 0.72 | 9-DOCOSENE                                              | 308    | C22H44    |
| 41.304  | 2.09 | DOCOSANE                                                | 310    | C22H46    |
| 42.639  | 0.45 | 1-TRICOSENE                                             | 322    | C23H46    |
| 42.704  | 1.86 | TRICOSANE                                               | 324    | C23H48    |
| 43.99   | 0.57 | 1-TETRACOSENE                                           | 336    | C24H48    |

|        |       |                 |     |        |
|--------|-------|-----------------|-----|--------|
| 44.055 | 1.88  | TETRACOSANE     | 338 | C24H50 |
| 45.35  | 1.67  | PENTACOSANE     | 352 | C25H52 |
| 46.601 | 1.48  | HEXACOSANE      | 366 | C26H54 |
| 47.806 | 1.22  | HEPTACOSANE     | 380 | C27H56 |
| 48.977 | 0.99  | OCTACOSANE      | 394 | C28H58 |
| 50.117 | 0.75  | NONACOSANE      | 408 | C29H60 |
| 51.223 | 0.53  | TRIACONTANE     | 422 | C30H62 |
| 52.313 | 0.37  | HENTRIACONTANE  | 436 | C31H64 |
|        | 52.18 | N-PARAFFINS     |     |        |
|        | 23.73 | N-OLEFINS       |     |        |
|        | 5.96  | ISO-PARAFFINS   |     |        |
|        |       | ISO-OLEFINS     |     |        |
|        | 18.12 | CYCLO-PARAFFINS |     |        |
|        | 0.00  | CYCLO-OLEFINS   |     |        |
|        | 0.00  | AROMATICS       |     |        |

Table S4. PE/PP 50/50 cracking product detailed composition (Sample 4).

| RT, min | %wt. | Component name                                                    | MW, Da | Structure |
|---------|------|-------------------------------------------------------------------|--------|-----------|
| 3.204   | 0.91 | 1-HEPTENE                                                         | 98     | C7H14     |
| 3.324   | 1.26 | HEPTANE                                                           | 100    | C7H16     |
| 3.394   | 0.33 | 2,3-DIMETHYL-1-HEXENE                                             | 112    | C8H16     |
| 4.589   | 0.36 | 2-HEXENE, 2,5-DIMETHYL-                                           | 112    | C8H16     |
| 4.819   | 2.91 | HEPTANE, 4-METHYL-                                                | 114    | C8H18     |
| 5.66    | 0.69 | 1-OCTENE                                                          | 112    | C8H16     |
| 5.985   | 0.98 | OCTANE                                                            | 114    | C8H18     |
| 6.49    | 0.33 | CYCLOHEXANE, 1,1,2-TRIMETHYL-                                     | 126    | C9H18     |
| 7.09    | 0.25 | 1-HEXENE, 3, 5, 5-TRIMETHYL-                                      | 126    | C9H18     |
| 7.53    | 0.73 | CYCLOHEXANE, 1,3,5-TRIMETHYL-, (1.ALPHA, 3.ALPHA,5.BETA)-         | 126    | C9H18     |
| 7.955   | 8.57 | 2,4-DIMETHYL-1-HEPTENE                                            | 126    | C9H18     |
| 8.946   | 1.17 | CYCLOHEXANE, 1,3,5-TRIMETHYL-                                     | 126    | C9H18     |
| 11.537  | 0.54 | 1-NONENE                                                          | 126    | C9H18     |
| 11.662  | 0.36 | 1-UNDECENE, 8-METHYL-                                             | 168    | C12H24    |
| 12.022  | 0.83 | NONANE                                                            | 128    | C9H20     |
| 16.319  | 0.98 | 1-DECENE                                                          | 140    | C10H20    |
| 16.644  | 1.09 | DECANE                                                            | 142    | C10H22    |
| 16.939  | 1.52 | NONANE, 2,6-DIMETHYL-                                             | 156    | C11H24    |
| 17.094  | 1.68 | OCTANE, 2,3,7-TRIMETHYL-                                          | 156    | C11H24    |
| 19.29   | 3.36 | 2-DECENE, 2,4-DIMETHYL-                                           | 168    | C12H24    |
| 19.425  | 2.91 | 1-DECENE, 2,4-DIMEYTHYL-                                          | 168    | C12H24    |
| 19.74   | 1.09 | 1-UNDECENE                                                        | 154    | C11H22    |
| 19.985  | 1.39 | UNDECANE                                                          | 156    | C11H24    |
| 20.726  | 0.23 | 1-UNDECENE, 9-METHYL-                                             | 168    | C12H24    |
| 21.381  | 0.57 | BICYCLO[3.1.1]HEPTANE,2,6,6-TRIMETHYL-, (1.ALPHA,2.BETA,5.ALPHA)- | 138    | C10H18    |
| 21.456  | 0.29 | (-)-TRANS-PINANE                                                  | 138    | C10H18    |
| 21.706  | 0.23 | 1,3-DIISOPROPYL CYCLOHEXANE                                       | 168    | C12H24    |
| 22.531  | 1.10 | 1-DODECENE                                                        | 168    | C12H24    |
| 22.741  | 1.49 | DODECANE                                                          | 170    | C12H26    |
| 23.577  | 0.40 | DECANE, 2,3,5,8-TETRAMETHYL-                                      | 198    | C14H30    |
| 23.782  | 0.41 | DODCECANE, 4,6-DIMETHYL-                                          | 198    | C14H30    |
| 23.952  | 0.32 | ISOOLEFIN/CYCLOPARAFFIN                                           |        |           |
| 24.997  | 1.06 | 1-TRIDECENE                                                       | 182    | C13H26    |
| 25.182  | 1.51 | TRIDECANE                                                         | 184    | C13H28    |
| 25.237  | 5.31 | 1-UNDECENE, 7-METHYL-                                             | 168    | C12H24    |

|        |      |                             |     |        |
|--------|------|-----------------------------|-----|--------|
| 25.437 | 2.75 | ISOOLEFIN/CYCLOPARAFFIN     |     |        |
| 25.628 | 4.63 | ISOOLEFIN/CYCLOPARAFFIN     |     |        |
| 26.238 | 0.28 | ISOOLEFIN/CYCLOPARAFFIN     |     |        |
| 26.828 | 0.59 | ISOOLEFIN/CYCLOPARAFFIN     |     |        |
| 27.243 | 1.15 | 1-TETRADECENE               | 196 | C14H28 |
| 27.408 | 1.51 | TETRADECANE                 | 198 | C14H30 |
| 28.619 | 0.38 | DODECANE, 2,6,11-TRIMETHYL- | 212 | C15H32 |
| 28.994 | 0.28 | DODECANE, 4,6-DIMETHYL-     | 198 | C14H30 |
| 29.184 | 0.33 | DECANE, 3,3,5-TRIMETHYL-    | 184 | C13H28 |
| 29.339 | 0.97 | 1-PENTADECENE               | 210 | C15H30 |
| 29.484 | 1.65 | PENTADECANE                 | 212 | C15H32 |
| 29.859 | 1.40 | ISOOLEFIN/CYCLOPARAFFIN     |     |        |
| 30.054 | 0.82 | ISOOLEFIN/CYCLOPARAFFIN     |     |        |
| 30.199 | 0.31 | ISOOLEFIN/CYCLOPARAFFIN     |     |        |
| 30.399 | 1.04 | ISOOLEFIN/CYCLOPARAFFIN     |     |        |
| 30.599 | 0.58 | ISOOLEFIN/CYCLOPARAFFIN     |     |        |
| 31.255 | 0.59 | ISOOLEFIN/CYCLOPARAFFIN     |     |        |
| 31.31  | 0.88 | CETENE                      | 224 | C16H32 |
| 31.445 | 1.69 | HEXADECANE                  | 226 | C16H34 |
| 31.76  | 0.26 | ISOOLEFIN/CYCLOPARAFFIN     |     |        |
| 33.176 | 0.82 | 1-HEPTADECENE               | 238 | C17H34 |
| 33.301 | 1.59 | HEPTADECANE                 | 240 | C17H36 |
| 33.851 | 1.83 | ISOOLEFIN/CYCLOPARAFFIN     |     |        |
| 34.016 | 0.39 | ISOOLEFIN/CYCLOPARAFFIN     |     |        |
| 34.166 | 0.30 | ISOOLEFIN/CYCLOPARAFFIN     |     |        |
| 34.361 | 1.58 | ISOOLEFIN/CYCLOPARAFFIN     |     |        |
| 34.491 | 0.23 | ISOOLEFIN/CYCLOPARAFFIN     |     |        |
| 34.726 | 0.25 | ISOOLEFIN/CYCLOPARAFFIN     |     |        |
| 34.931 | 1.20 | 3-OCTADECENE, (E)-          | 252 | C18H36 |
| 35.056 | 1.58 | OCTADECANE                  | 254 | C18H38 |
| 35.121 | 0.68 | ISOOLEFIN/CYCLOPARAFFIN     |     |        |
| 36.632 | 0.69 | 1-NONADECENE                | 266 | C19H38 |
| 36.732 | 1.47 | NONADECANE                  | 268 | C19H40 |
| 37.412 | 0.81 | ISOOLEFIN/CYCLOPARAFFIN     |     |        |
| 37.542 | 0.22 | ISOOLEFIN/CYCLOPARAFFIN     |     |        |
| 37.837 | 0.41 | ISOOLEFIN/CYCLOPARAFFIN     |     |        |
| 38.233 | 0.60 | 3-EICOSENE, (E)-            | 280 | C20H40 |
| 38.323 | 1.41 | EICOSANE                    | 282 | C20H42 |
| 38.573 | 0.70 | ISOOLEFIN/CYCLOPARAFFIN     |     |        |
| 39.768 | 0.46 | 3-HENEICOSENE, (E)-         | 294 | C21H42 |
| 39.853 | 1.26 | HENEICOSANE                 | 296 | C21H44 |
| 40.633 | 0.62 | ISOOLEFIN/CYCLOPARAFFIN     |     |        |
| 40.984 | 0.46 | ISOOLEFIN/CYCLOPARAFFIN     |     |        |
| 41.239 | 0.38 | 9-EICOSENE, (E)-            | 280 | C20H40 |
| 41.314 | 1.21 | DOCOSANE                    | 310 | C22H46 |
| 41.699 | 0.63 | ISOOLEFIN/CYCLOPARAFFIN     |     |        |
| 42.649 | 0.37 | 1-DOCOSENE                  | 308 | C22H44 |
| 42.714 | 1.22 | TRICOSANE                   | 324 | C23H48 |
| 43.565 | 0.35 | ISOOLEFIN/CYCLOPARAFFIN     |     |        |
| 44.005 | 0.38 | 1-TRICOSENE                 | 322 | C23H46 |
| 44.06  | 1.10 | TETRACOSANE                 | 338 | C24H50 |
| 44.565 | 0.34 | ISOOLEFIN/CYCLOPARAFFIN     |     |        |
| 45.355 | 1.05 | PENTACOSANE                 | 352 | C25H52 |
| 46.261 | 0.25 | ISOOLEFIN/CYCLOPARAFFIN     |     |        |

|        |      |                         |     |        |
|--------|------|-------------------------|-----|--------|
| 46.611 | 0.92 | HEXACOSANE              | 366 | C26H54 |
| 47.196 | 0.27 | ISOOLEFIN/CYCLOPARAFFIN |     |        |
| 47.816 | 0.80 | HEPTACOSANE             | 380 | C27H56 |
| 48.987 | 0.70 | OCTACOSANE              | 394 | C28H58 |
| 50.117 | 0.55 | NONACOSANE              | 408 | C29H60 |
| 51.223 | 0.41 | TRIACONTANE             | 422 | C30H62 |
| 52.308 | 0.28 | HENTRIACONTANE          | 436 | C31H64 |
| 28.95  |      | N-PARAFFINS             |     |        |
| 14.27  |      | N-OLEFINS               |     |        |
| 7.91   |      | ISO-PARAFFINS           |     |        |
| 48.87  |      | ISO-OLEFINS             |     |        |
|        |      | CYCLO-PARAFFINS         |     |        |
| 0.00   |      | CYCLO-OLEFINS           |     |        |
| 0.00   |      | AROMATICS               |     |        |

Table S5. PE/PP 25/75 cracking product detailed composition (Sample 5).

| RT, min | %wt.  | Component name                                                    | MW, Da | Structure |
|---------|-------|-------------------------------------------------------------------|--------|-----------|
| 3.189   | 0.39  | 1-HEPTENE                                                         | 98     | C7H14     |
| 4.564   | 0.44  | CYCLOPENTANE, 1,2,4-TRIMETHYL-                                    | 112    | C8H16     |
| 4.784   | 2.74  | HEPTANE, 4-METHYL-                                                | 114    | C8H18     |
| 5.965   | 0.20  | OCTANE                                                            | 114    | C8H18     |
| 6.44    | 0.28  | CYCLOHEXANE, 1,1,2-TRIMETHYL-                                     | 126    | C9H18     |
| 7.05    | 0.16  | HEPTANE, 2,4-DIMETHYL-                                            | 128    | C9H20     |
| 7.46    | 0.78  | CYCLOHEXANE, 1,3,5-TRIMETHYL-                                     | 126    | C9H18     |
| 7.895   | 11.20 | 2,4-DIMETHYL-1-HEPTENE                                            | 126    | C9H18     |
| 8.861   | 1.30  | CYCLOHEXANE, 1,2,4-TRIMETHYL-, (1.ALPHA,2.BETA,4.BETA)-           | 126    | C9H18     |
| 10.051  | 0.12  | CYCLOHEXENE, 3,3,5-TRIMETHYL                                      | 124    | C9H16     |
| 11.567  | 0.38  | 1-NONENE                                                          | 126    | C9H18     |
| 11.987  | 0.15  | PENTANE, 2,2,3,4-TETRAMETHYL-                                     | 128    | C9H20     |
| 16.299  | 0.34  | 1-DECENE                                                          | 140    | C10H20    |
| 16.359  | 0.19  | CYCLOPROPANE, 1,2-DIMETHYL-1-PENTYL-                              | 140    | C10H20    |
| 16.624  | 0.29  | DECANE                                                            | 142    | C10H22    |
| 16.914  | 1.71  | NONANE, 2,6-DIMETHYL-                                             | 156    | C11H24    |
| 17.069  | 1.85  | OCTANE, 2,3,6-TRIMETHYL-                                          | 156    | C11H24    |
| 18.68   | 0.22  | ISOOLEFIN/CYCLOPARAFFIN                                           |        |           |
| 18.775  | 0.22  | 1-NONENE, 4,6,8-TRIMETHYL-                                        | 168    | C12H24    |
| 19.275  | 4.53  | 1-UNDECENE, 5-METHYL-                                             | 168    | C12H24    |
| 19.41   | 4.34  | 1-DECENE, 2,4-DIMETHYL-                                           | 168    | C12H24    |
| 19.72   | 0.35  | 1-UNDECENE                                                        | 154    | C11H22    |
| 19.97   | 0.41  | UNDECANE                                                          | 156    | C11H24    |
| 21.361  | 0.72  | BICYCLO[3.1.1]HEPTANE,2,6,6-TRIMETHYL-, (1.ALPHA,2.BETA,5.ALPHA)- | 138    | C10H18    |
| 21.436  | 0.43  | (-)-TRANS-PINANE                                                  | 138    | C10H18    |
| 22.516  | 0.36  | 1,3-DIISOPROPYL CYCLOHEXANE                                       | 168    | C12H24    |
| 22.726  | 0.43  | DODECANE                                                          | 170    | C12H26    |
| 23.562  | 0.34  | DECANE, 2,3,5,8-TETRAMETHYL-                                      | 198    | C14H30    |
| 23.767  | 0.34  | DODCECANE, 4,6-DIMETHYL-                                          | 198    | C14H30    |
| 24.982  | 0.33  | ISOOLEFIN/CYCLOPARAFFIN                                           |        |           |
| 25.237  | 7.99  | ISOOLEFIN/CYCLOPARAFFIN                                           |        |           |
| 25.432  | 4.97  | ISOOLEFIN/CYCLOPARAFFIN                                           |        |           |
| 25.628  | 7.45  | ISOOLEFIN/CYCLOPARAFFIN                                           |        |           |
| 26.818  | 0.87  | ISOOLEFIN/CYCLOPARAFFIN                                           |        |           |
| 27.233  | 0.45  | 1-TETRADECENE                                                     | 196    | C14H28    |
| 27.398  | 0.50  | TETRADECANE                                                       | 198    | C14H30    |

|        |      |                                  |     |        |
|--------|------|----------------------------------|-----|--------|
| 29.334 | 0.43 | 1-PENTADECENE                    | 210 | C15H30 |
| 29.479 | 0.64 | PENTADECANE                      | 210 | C15H32 |
| 29.854 | 2.30 | ISOOLEFIN/CYCLOPARAFFIN          |     |        |
| 30.049 | 1.48 | ISOOLEFIN/CYCLOPARAFFIN          |     |        |
| 30.189 | 0.56 | ISOOLEFIN/CYCLOPARAFFIN          |     |        |
| 30.394 | 1.88 | ISOOLEFIN/CYCLOPARAFFIN          |     |        |
| 30.594 | 0.94 | ISOOLEFIN/CYCLOPARAFFIN          |     |        |
| 31.25  | 1.13 | ISOOLEFIN/CYCLOPARAFFIN          |     |        |
| 31.31  | 0.45 | CETENE                           | 224 | C16H32 |
| 31.44  | 0.74 | HEXADECANE                       | 226 | C16H34 |
| 32.54  | 0.13 | ISOOLEFIN/CYCLOPARAFFIN          |     |        |
| 33.175 | 0.44 | 1-HEPTADECENE                    | 238 | C17H34 |
| 33.296 | 0.60 | HEPTADECANE                      | 240 | C17H36 |
| 33.851 | 3.06 | ISOOLEFIN/CYCLOPARAFFIN          |     |        |
| 34.016 | 0.84 | ISOOLEFIN/CYCLOPARAFFIN          |     |        |
| 34.166 | 0.50 | ISOOLEFIN/CYCLOPARAFFIN          |     |        |
| 34.366 | 3.19 | ISOOLEFIN/CYCLOPARAFFIN          |     |        |
| 34.491 | 0.67 | ISOOLEFIN/CYCLOPARAFFIN          |     |        |
| 34.731 | 0.39 | ISOOLEFIN/CYCLOPARAFFIN          |     |        |
| 34.926 | 1.73 | 3-OCTADECENE, (E)-               | 252 | C18H36 |
| 35.056 | 0.85 | OCTADECANE                       | 254 | C18H38 |
| 35.121 | 1.19 | ISOOLEFIN/CYCLOPARAFFIN          |     |        |
| 36.632 | 0.44 | 1-NONADECENE                     | 266 | C19H38 |
| 36.737 | 0.60 | NONADECANE                       | 268 | C19H40 |
| 37.417 | 1.37 | ISOOLEFIN/CYCLOPARAFFIN          |     |        |
| 37.542 | 0.43 | ISOOLEFIN/CYCLOPARAFFIN          |     |        |
| 37.842 | 0.66 | ISOOLEFIN/CYCLOPARAFFIN          |     |        |
| 38.243 | 0.42 | 3-EICOSENE, (E)-                 | 280 | C20H40 |
| 38.338 | 0.59 | EICOSANE                         | 282 | C20H42 |
| 38.578 | 1.32 | ISOOLEFIN/CYCLOPARAFFIN          |     |        |
| 39.778 | 0.35 | HENEICOS-1-ENE                   | 294 | C21H42 |
| 39.863 | 0.55 | HENEICOSANE                      | 296 | C21H44 |
| 40.644 | 1.02 | ISOOLEFIN/CYCLOPARAFFIN          |     |        |
| 40.749 | 0.29 | ISOOLEFIN/CYCLOPARAFFIN          |     |        |
| 40.999 | 0.88 | ISOOLEFIN/CYCLOPARAFFIN          |     |        |
| 41.169 | 0.38 | ISOOLEFIN/CYCLOPARAFFIN          |     |        |
| 41.259 | 0.42 | 9-EICOSENE, (E)-                 | 280 | C20H40 |
| 41.334 | 0.63 | DOCOSANE                         | 310 | C22H46 |
| 41.714 | 1.42 | ISOOLEFIN/CYCLOPARAFFIN          |     |        |
| 41.824 | 0.26 | ISOOLEFIN/CYCLOPARAFFIN          |     |        |
| 42.674 | 0.30 | 1-DOCOSENE                       | 308 | C22H44 |
| 42.744 | 0.53 | TRICOSANE                        | 324 | C23H48 |
| 43.59  | 0.50 | ISOOLEFIN/CYCLOPARAFFIN          |     |        |
| 43.91  | 0.31 | 1-TRICOSENE                      | 322 | C23H46 |
| 44.105 | 0.51 | TETRACOSANE                      | 338 | C24H50 |
| 44.595 | 0.85 | ISOOLEFIN/CYCLOPARAFFIN          |     |        |
| 45.05  | 0.40 | 1,3,5-TRIS(CYCLOHEXYL)PENT-1-ENE | 316 | C23H40 |
| 45.41  | 0.42 | PENTACOSANE                      | 352 | C25H52 |
| 46.681 | 0.51 | HEXACOSANE                       | 366 | C26H54 |
| 47.236 | 0.48 | ISOOLEFIN/CYCLOPARAFFIN          |     |        |
| 47.906 | 0.32 | HEPTACOSANE                      | 380 | C27H56 |
| 48.802 | 0.20 | ISOOLEFIN/CYCLOPARAFFIN          |     |        |
| 49.127 | 0.28 | OCTACOSANE                       | 394 | C28H58 |
| 49.692 | 0.22 | ISOOLEFIN/CYCLOPARAFFIN          |     |        |



|        |      |                         |     |        |
|--------|------|-------------------------|-----|--------|
| 50.277 | 0.14 | NONACOSANE              | 408 | C29H60 |
| 51.998 | 0.16 | ISOOLEFIN/CYCLOPARAFFIN |     |        |
|        | 9.72 | N-PARAFFINS             |     |        |
|        | 7.21 | N-OLEFINS               |     |        |
|        | 7.29 | ISO-PARAFFINS           |     |        |
|        |      | ISO-OLEFINS             |     |        |
| 75.27  |      | CYCLO-PARAFFINS         |     |        |
|        | 0.51 | CYCLO-OLEFINS           |     |        |
|        | 0.00 | AROMATICS               |     |        |

Table S6. PS cracking product detailed composition (Sample 6).

| RT, min | %wt.  | Component name                                                 | MW, Da | Structure |
|---------|-------|----------------------------------------------------------------|--------|-----------|
| 4.829   | 3.03  | TOLUENE                                                        | 92     | C7H8      |
| 8.126   | 0.42  | 2,4-DIMETHYL-1-HEPTENE                                         | 126    | C9H18     |
| 9.146   | 6.30  | ETHYLBENZENE                                                   | 106    | C8H10     |
| 11.427  | 33.90 | STYRENE                                                        | 104    | C8H8      |
| 13.178  | 1.49  | BENZENE, (1-METHYLETHYL)-                                      | 120    | C9H12     |
| 15.899  | 7.75  | .ALPHA.-METHYLSTYRENE                                          | 118    | C9H10     |
| 27.403  | 0.36  | TETRADECANE                                                    | 198    | C14H30    |
| 29.484  | 0.36  | PENTADECANE                                                    | 212    | C15H32    |
| 31.445  | 0.36  | HEXADECANE                                                     | 226    | C16H34    |
| 32.71   | 18.13 | BENZENE, 1,1'-(1,3-PROPANEDIYL)BIS-                            | 196    | C15H16    |
| 33.16   | 2.15  | BENZENE, 1,1'-(1-METHYL-1,3-PROPANEDIYL)                       | 210    | C16H18    |
| 33.321  | 0.40  | HEPTADECANE                                                    | 240    | C17H36    |
| 33.916  | 12.13 | BENZENE, 1,1'-(2-BUTENE-1,4-DIYL)BIS-                          | 208    | C16H16    |
| 34.011  | 2.78  | BENZENE, 1,1'-(2-PENTENE-1,5-DIYL)BIS-                         | 222    | C17H18    |
| 34.186  | 1.80  | 1,2-DIPHENYLCYCLOPROPANE                                       | 194    | C15H14    |
| 35.056  | 0.35  | OCTADECANE                                                     | 254    | C18H38    |
| 35.286  | 0.35  | BENZENE, 1,1'-(3-METHYL-1-PROPENE-1,3-DIYL)BIS-                | 208    | C16H16    |
| 44.92   | 7.32  | BENZENE, 1,1'-[1-(2,2-DIMETHYL-3-BUTENYL)-1,3-PROPANEDIYL]BIS- | 278    | C21H26    |
| 51.023  | 0.62  | 1,1':3',1"-TERPHENYL, 5'-PHENYL-                               | 306    | C24H18    |
|         | 1.83  | N-PARAFFINS                                                    |        |           |
|         | 0.00  | N-OLEFINS                                                      |        |           |
|         | 0.00  | ISO-PARAFFINS                                                  |        |           |
|         |       | ISO-OLEFINS                                                    |        |           |
| 0.42    |       | CYCLO-PARAFFINS                                                |        |           |
|         | 0.00  | CYCLO-OLEFINS                                                  |        |           |
|         | 97.75 | AROMATICS                                                      |        |           |

Table S7. PE/PP/PS 45/45/10 cracking product detailed composition (Sample 7).

| RT, min | %wt. | Component name                | MW, Da | Structure |
|---------|------|-------------------------------|--------|-----------|
| 3.174   | 0.21 | 1-HEPTENE                     | 98     | C7H14     |
| 3.294   | 0.30 | HEPTANE                       | 100    | C7H16     |
| 4.544   | 0.18 | 2,3-DIMETHYL-1-HEXENE         | 112    | C8H16     |
| 4.784   | 4.80 | TOLUENE                       | 92     | C7H8      |
| 5.62    | 0.23 | OCTENE                        | 112    | C8H16     |
| 5.94    | 0.24 | OCTANE                        | 114    | C8H18     |
| 6.405   | 0.27 | 1-HEXENE, 3,3,5-TRIMETHYL-    | 126    | C9H18     |
| 7.04    | 0.18 | CYCLOHEXANE, 1,2,4-TRIMETHYL- | 126    | C9H18     |
| 7.445   | 0.62 | CYCLOHEXANE, 1,3,5-TRIMETHYL- | 126    | C9H18     |
| 7.87    | 7.93 | 2,4-DIMETHYL-1-HEPTENE        | 126    | C9H18     |
| 8.836   | 1.13 | CYCLOHEXANE, 1,3,5-TRIMETHYL- | 126    | C9H18     |

|        |      |                                            |     |        |
|--------|------|--------------------------------------------|-----|--------|
| 9.121  | 0.90 | ETHYLBENZENE                               | 106 | C8H10  |
| 9.991  | 0.14 | 5-METHYLOCTENE-1                           | 126 | C9H18  |
| 10.632 | 0.13 | CYCLOHEXENE, 3,3,5-TRIMETHYL-              | 124 | C9H16  |
| 11.267 | 3.12 | STYRENE                                    | 104 | C8H8   |
| 11.517 | 0.68 | 1-NONENE                                   | 126 | C9H18  |
| 11.967 | 0.27 | NONANE                                     | 128 | C9H20  |
| 13.153 | 0.14 | BENZENE, (1-METHYLETHYL)-                  | 120 | C9H12  |
| 15.839 | 0.89 | .ALPHA.-METHYLSTYRENE                      | 118 | C9H10  |
| 16.279 | 0.30 | 1-DECENE                                   | 140 | C10H20 |
| 16.609 | 0.26 | DECANE                                     | 142 | C10H22 |
| 16.894 | 1.60 | NONANE, 2,6-DIMETHYL-                      | 156 | C11H24 |
| 17.049 | 1.67 | NONANE, 2,4-DIMETHYL-                      | 156 | C11H24 |
| 18.585 | 0.25 | 2-HEPTENE, 5-ETHYL-2,4-DIMETHYL            | 154 | C11H22 |
| 18.655 | 0.40 | 2-DECENE, 2,4-DIMETHYL-                    | 168 | C12H24 |
| 18.75  | 0.41 | 5-ETHYL-1-NONENE                           | 154 | C11H22 |
| 19.25  | 3.53 | 2-DECENE, 8-METHYL-, (Z)-                  | 154 | C11H22 |
| 19.39  | 3.11 | 2-DECENE, 8-METHYL-, (Z)-                  | 154 | C11H22 |
| 19.705 | 0.31 | UNDECENE                                   | 154 | C11H22 |
| 19.95  | 0.40 | UNDECANE                                   | 156 | C11H24 |
| 21.346 | 0.55 | 2-DECENE, 2,4-DIMETHYL-                    | 168 | C12H24 |
| 21.416 | 0.29 | 1-ISOPROPYL-1,4,5-TRIMETHYLCYCLOHEXANE     | 168 | C12H24 |
| 22.501 | 0.33 | 1,3-DIISOPROPYL CYCLOHEXANE                | 168 | C12H24 |
| 22.646 | 0.14 | 1-DODECENE                                 | 168 | C12H24 |
| 22.706 | 0.44 | DODECANE                                   | 170 | C12H26 |
| 23.547 | 0.30 | ISOOLEFIN/CYCLOPARAFFIN                    | 182 | C13H26 |
| 24.967 | 0.33 | 1-TRIDECENE                                | 182 | C13H26 |
| 25.062 | 0.47 | TRIDECANE                                  | 184 | C13H28 |
| 25.217 | 6.97 | 1-UNDECENE, 7-METHYL-                      | 168 | C12H24 |
| 25.413 | 3.74 | ISOOLEFIN/CYCLOPARAFFIN                    | 196 | C14H28 |
| 25.603 | 6.12 | ISOOLEFIN/CYCLOPARAFFIN                    | 196 | C14H28 |
| 25.673 | 1.05 | BENZENE, HEPTYL-                           | 176 | C13H20 |
| 26.093 | 0.24 | ISOOLEFIN/CYCLOPARAFFIN                    | 196 | C14H28 |
| 26.213 | 0.53 | ISOOLEFIN/CYCLOPARAFFIN                    | 196 | C14H28 |
| 26.708 | 0.49 | ISOOLEFIN/CYCLOPARAFFIN                    | 196 | C14H28 |
| 26.803 | 1.04 | ISOOLEFIN/CYCLOPARAFFIN                    | 196 | C14H28 |
| 26.898 | 0.20 | 1-CYCLOPENTYL-4-(1-METHYLETHYL)CYCLOHEXANE | 194 | C14H26 |
| 27.223 | 0.59 | 1-TETRADECENE                              | 196 | C14H28 |
| 27.378 | 0.40 | TETRADECANE                                | 198 | C14H30 |
| 29.839 | 2.03 | ISOOLEFIN/CYCLOPARAFFIN                    | 226 | C15H30 |
| 30.029 | 1.31 | ISOOLEFIN/CYCLOPARAFFIN                    | 226 | C15H30 |
| 30.379 | 1.49 | ISOOLEFIN/CYCLOPARAFFIN                    | 226 | C15H30 |
| 30.575 | 0.83 | ISOOLEFIN/CYCLOPARAFFIN                    | 212 | C15H32 |
| 30.67  | 0.22 | ISOOLEFIN/CYCLOPARAFFIN                    | 226 | C16H34 |
| 31.155 | 0.21 | ISOOLEFIN/CYCLOPARAFFIN                    | 226 | C16H34 |
| 31.235 | 1.02 | ISOOLEFIN/CYCLOPARAFFIN                    | 226 | C16H34 |
| 31.29  | 0.64 | CETENE                                     | 224 | C16H32 |
| 31.42  | 0.75 | HEXADECANE                                 | 226 | C16H34 |
| 32.53  | 0.52 | ISOOLEFIN/CYCLOPARAFFIN                    | 238 | C17H34 |
| 32.61  | 1.31 | BENZENE, 1,1'-(1,4-BUTANEDIYL)BIS-         | 210 | C16H18 |
| 32.705 | 0.25 | ISOOLEFIN/CYCLOPARAFFIN                    | 238 | C17H34 |
| 33.061 | 0.27 | ISOOLEFIN/CYCLOPARAFFIN                    | 238 | C17H34 |
| 33.161 | 0.51 | 1-HEPTADECENE                              | 238 | C17H34 |
| 33.281 | 0.64 | HEPTADECANE                                | 240 | C17H36 |
| 33.831 | 4.02 | ISOOLEFIN/CYCLOPARAFFIN                    | 252 | C18H36 |

|        |       |                         |     |        |
|--------|-------|-------------------------|-----|--------|
| 33.996 | 0.51  | ISOOLEFIN/CYCLOPARAFFIN | 252 | C18H36 |
| 34.146 | 0.55  | ISOOLEFIN/CYCLOPARAFFIN | 252 | C18H36 |
| 34.346 | 2.81  | ISOOLEFIN/CYCLOPARAFFIN | 252 | C18H36 |
| 34.476 | 0.57  | ISOOLEFIN/CYCLOPARAFFIN | 252 | C18H36 |
| 34.906 | 1.50  | 3-OCTADECENE, (E)-      | 252 | C18H36 |
| 35.041 | 0.78  | OCTADECANE              | 252 | C18H38 |
| 35.101 | 1.12  | ISOOLEFIN/CYCLOPARAFFIN | 266 | C19H38 |
| 35.577 | 0.43  | ISOOLEFIN/CYCLOPARAFFIN | 266 | C19H38 |
| 36.617 | 0.41  | 1-NONADECENE            | 266 | C19H38 |
| 36.717 | 0.46  | NONADECANE              | 266 | C19H40 |
| 37.402 | 1.39  | ISOOLEFIN/CYCLOPARAFFIN | 280 | C20H40 |
| 37.527 | 0.42  | ISOOLEFIN/CYCLOPARAFFIN | 280 | C20H40 |
| 37.827 | 0.51  | ISOOLEFIN/CYCLOPARAFFIN | 280 | C20H40 |
| 38.233 | 0.45  | EICOSENE                | 280 | C20H40 |
| 38.318 | 0.36  | EICOSANE                | 282 | C20H42 |
| 38.563 | 0.97  | ISOOLEFIN/CYCLOPARAFFIN | 294 | C21H42 |
| 39.763 | 0.29  | HENEICOSENE             | 294 | C21H42 |
| 39.848 | 0.47  | HENEICOSANE             | 296 | C21H44 |
| 40.629 | 0.99  | ISOOLEFIN/CYCLOPARAFFIN | 308 | C22H44 |
| 40.729 | 0.35  | ISOOLEFIN/CYCLOPARAFFIN | 308 | C22H44 |
| 40.984 | 0.69  | ISOOLEFIN/CYCLOPARAFFIN | 308 | C22H44 |
| 41.159 | 0.33  | ISOOLEFIN/CYCLOPARAFFIN | 308 | C22H44 |
| 41.249 | 0.44  | 9-DOCOSENE              | 308 | C22H44 |
| 41.314 | 0.51  | DOCOSANE                | 310 | C22H46 |
| 41.694 | 1.04  | ISOOLEFIN/CYCLOPARAFFIN | 308 | C22H44 |
| 42.659 | 0.25  | TRICOSENE               | 322 | C23H46 |
| 42.729 | 0.40  | TRICOSANE               | 324 | C23H48 |
| 43.575 | 0.51  | ISOOLEFIN/CYCLOPARAFFIN | 336 | C24H48 |
| 43.67  | 0.21  | ISOOLEFIN/CYCLOPARAFFIN | 336 | C24H48 |
| 43.895 | 0.31  | ISOOLEFIN/CYCLOPARAFFIN | 336 | C24H48 |
| 43.98  | 0.61  | ISOOLEFIN/CYCLOPARAFFIN | 336 | C24H48 |
| 44.09  | 0.52  | TETRACOSANE             | 338 | C24H50 |
| 44.58  | 0.56  | ISOOLEFIN/CYCLOPARAFFIN | 350 | C25H50 |
| 44.715 | 0.30  | ISOOLEFIN/CYCLOPARAFFIN | 350 | C25H50 |
| 45.33  | 0.35  | PENTACOSANE             | 352 | C25H52 |
| 46.276 | 0.41  | ISOOLEFIN/CYCLOPARAFFIN | 364 | C26H52 |
| 46.566 | 0.29  | ISOOLEFIN/CYCLOPARAFFIN | 364 | C26H52 |
| 46.656 | 0.40  | HEXACOSANE              | 366 | C26H54 |
| 47.126 | 0.21  | ISOOLEFIN/CYCLOPARAFFIN | 378 | C27H54 |
| 47.216 | 0.42  | ISOOLEFIN/CYCLOPARAFFIN | 378 | C27H54 |
| 47.881 | 0.24  | HEPTACOSANE             | 380 | C27H56 |
| 48.787 | 0.23  | ISOOLEFIN/CYCLOPARAFFIN |     |        |
| 49.112 | 0.26  | OCTACOSANE              | 394 | C28H58 |
| 49.667 | 0.21  | ISOOLEFIN/CYCLOPARAFFIN |     |        |
| 50.262 | 0.15  | NONACOSANE              | 408 | C29H60 |
|        | 9.06  | N-PARAFFINS             |     |        |
|        | 7.27  | N-OLEFINS               |     |        |
|        | 3.27  | ISO-PARAFFINS           |     |        |
|        |       | ISO-OLEFINS             |     |        |
|        | 68.08 | CYCLO-PARAFFINS         |     |        |
|        | 0.13  | CYCLO-OLEFINS           |     |        |
|        | 12.20 | AROMATICS               |     |        |

Table S8. PE/PS/PET/PVC 95/2/2/1 cracking product detailed composition (Sample 8).

| RT, min | %wt.  | Component name                        | MW, Da | Structure |
|---------|-------|---------------------------------------|--------|-----------|
| 3.204   | 1.20  | 1-HEPTENE                             | 98     | C7H14     |
| 3.324   | 2.10  | HEPTANE                               | 100    | C7H16     |
| 4.844   | 1.18  | TOLUENE                               | 92     | C7H8      |
| 5.66    | 1.29  | 1-OCTENE                              | 112    | C8H16     |
| 5.98    | 1.99  | OCTANE                                | 114    | C8H18     |
| 9.251   | 0.39  | ETHYLBENZENE                          | 106    | C8H10     |
| 11.402  | 0.43  | STYRENE                               | 104    | C8H8      |
| 11.532  | 1.02  | 1-NONENE                              | 126    | C9H18     |
| 12.012  | 1.78  | NONANE                                | 128    | C9H20     |
| 16.314  | 2.07  | 1-DECENE                              | 140    | C10H20    |
| 16.634  | 2.83  | DECANE                                | 142    | C10H22    |
| 19.73   | 2.25  | 1-UNDECENE                            | 154    | C11H22    |
| 19.975  | 3.65  | UNDECANE                              | 156    | C11H24    |
| 22.521  | 2.27  | 1-DODECENE                            | 168    | C12H24    |
| 22.732  | 3.95  | DODECANE                              | 170    | C12H26    |
| 24.987  | 2.12  | 1-TRIDECENE                           | 182    | C13H26    |
| 25.168  | 4.05  | TRIDECANE                             | 184    | C13H28    |
| 27.233  | 2.34  | 1-TETRADECENE                         | 196    | C14H28    |
| 27.398  | 4.16  | TETRADECANE                           | 198    | C14H30    |
| 29.329  | 1.87  | 1-PENTADECENE                         | 210    | C15H30    |
| 29.479  | 4.33  | PENTADECANE                           | 212    | C15H32    |
| 31.3    | 1.72  | CETENE                                | 224    | C16H32    |
| 31.435  | 4.40  | HEXADECANE                            | 226    | C16H34    |
| 33.166  | 1.59  | 1-HEPTADECENE                         | 238    | C17H34    |
| 33.286  | 4.27  | HEPTADECANE                           | 240    | C17H36    |
| 33.831  | 0.44  | BENZENE, 1,1'-(2-BUTENE-1,4-DIYL)BIS- | 208    | C16H16    |
| 34.936  | 1.41  | 3-OCTADECENE, (E)-                    | 252    | C18H36    |
| 35.047  | 4.09  | OCTADECANE                            | 254    | C18H38    |
| 35.127  | 0.33  | 5-OCTADECENE, (E)-                    | 252    | C18H36    |
| 36.622  | 1.20  | 1-NONADECENE                          | 266    | C19H38    |
| 36.722  | 4.01  | NONADECANE                            | 268    | C19H40    |
| 38.228  | 1.01  | 3-EICOSENE, (E)-                      | 280    | C20H40    |
| 38.318  | 3.66  | EICOSANE                              | 282    | C20H42    |
| 39.763  | 0.91  | 3-HENEICOSENE, (E)-                   | 294    | C21H42    |
| 39.843  | 3.47  | HENEICOSANE                           | 296    | C21H44    |
| 41.229  | 0.74  | 9-DOCOSENE                            | 308    | C22H44    |
| 41.304  | 3.18  | DOCOSANE                              | 310    | C22H46    |
| 42.64   | 0.54  | 1-TRICOSENE                           | 322    | C23H46    |
| 42.705  | 2.91  | TRICOSANE                             | 324    | C23H48    |
| 43.985  | 0.53  | 9-TRICOSENE, (Z)-                     | 322    | C23H46    |
| 44.05   | 2.59  | TETRACOSANE                           | 338    | C24H50    |
| 45.346  | 2.45  | PENTACOSANE                           | 352    | C25H52    |
| 46.596  | 2.06  | HEXACOSANE                            | 366    | C26H54    |
| 47.807  | 1.71  | HEPTACOSANE                           | 380    | C27H56    |
| 48.977  | 1.34  | OCTACOSANE                            | 394    | C28H58    |
| 50.113  | 0.99  | NONACOSANE                            | 408    | C29H60    |
| 51.218  | 0.72  | TRIACONTANE                           | 422    | C30H62    |
| 52.304  | 0.46  | HENTRIACONTANE                        | 436    | C31H64    |
|         | 71.15 | N-PARAFFINS                           |        |           |
|         | 26.41 | N-OLEFINS                             |        |           |
|         | 0.00  | ISO-PARAFFINS                         |        |           |
|         | 0.00  | ISO-OLEFINS                           |        |           |
|         | 0.00  | CYCLO-PARAFFINS                       |        |           |

|      |               |
|------|---------------|
| 0.00 | CYCLO-OLEFINS |
| 2.45 | AROMATICS     |

Table S9: PP/PS/PET/PVC 95/3/1/1 cracking product detailed composition (Sample 9)

| RT, min | %wt. | Component name                     | MW, Da | Structure |
|---------|------|------------------------------------|--------|-----------|
| 3.389   | 0.51 | 2,3-DIMETHYL-1-HEXENE              | 112    | C8H16     |
| 4.554   | 0.59 | 2-HEXENE, 2,5-DIMETHYL-            | 112    | C8H16     |
| 4.799   | 2.52 | TOLUENE                            | 92     | C7H8      |
| 6.485   | 0.20 | CYCLOHEXANE, 1,1,2-TRIMETHYL-      | 126    | C9H18     |
| 7.515   | 2.90 | 2,3-DIMETHYL-2-HEPTENE             | 126    | C9H18     |
| 7.915   | 9.52 | 2,4-DIMETHYL-1-HEPTENE             | 126    | C9H18     |
| 8.901   | 0.91 | CYCLOHEXANE, 1,3,5-TRIMETHYL-      | 126    | C9H18     |
| 9.211   | 0.29 | ETHYLBENZENE                       | 106    | C8H10     |
| 10.066  | 0.17 | CYCLOHEXENE, 3,3,5-TRIMETHYL-      | 124    | C9H16     |
| 11.332  | 1.28 | STYRENE                            | 104    | C8H8      |
| 11.612  | 0.37 | 1-UNDECENE, 8-METHYL-              | 168    | C12H24    |
| 15.894  | 0.15 | .ALPHA.-METHYLSTYRENE              | 118    | C9H10     |
| 16.929  | 1.50 | NONANE, 2,6-DIMETHYL-              | 156    | C11H24    |
| 17.084  | 1.54 | OCTANE, 2,3,7-TRIMETHYL-           | 156    | C11H24    |
| 18.685  | 1.31 | 2-OCTENE, 2,3,7-TRIMETHYL-         | 154    | C11H22    |
| 18.785  | 1.22 | 2-DECENE, 2,2-DIMETHYL-            | 168    | C12H24    |
| 19.285  | 3.56 | 2-DECENE, 2,4-DIMETHYL-            | 168    | C12H24    |
| 19.42   | 3.33 | 1-DECENE, 2,4-DIMEYTHYL-           | 168    | C12H24    |
| 20.571  | 0.26 | 1,6-OCTADIENE, 5,7-DIMETHYL-, (R)- | 138    | C10H18    |
| 21.376  | 0.44 | ISOOLEFIN/CYCLOPARAFFIN            |        |           |
| 21.446  | 0.23 | ISOOLEFIN/CYCLOPARAFFIN            |        |           |
| 21.701  | 0.16 | ISOOLEFIN/CYCLOPARAFFIN            |        |           |
| 23.572  | 0.25 | DECANE, 2,3,5,8-TETRAMETHYL-       | 198    | C14H30    |
| 23.782  | 0.27 | DODCECANE, 4,6-DIMETHYL-           | 198    | C14H30    |
| 24.522  | 3.04 | ISOOLEFIN/CYCLOPARAFFIN            |        |           |
| 24.687  | 0.89 | ISOOLEFIN/CYCLOPARAFFIN            |        |           |
| 24.847  | 0.80 | ISOOLEFIN/CYCLOPARAFFIN            |        |           |
| 25.087  | 2.71 | ISOOLEFIN/CYCLOPARAFFIN            |        |           |
| 25.237  | 6.64 | 1-UNDECENE, 7-METHYL-              | 168    | C12H24    |
| 25.438  | 4.07 | ISOOLEFIN/CYCLOPARAFFIN            |        |           |
| 25.628  | 5.94 | ISOOLEFIN/CYCLOPARAFFIN            |        |           |
| 26.048  | 0.15 | CYCLOHEXANE, 2,4-DIETHYL-1-METHYL- | 154    | C11H22    |
| 26.118  | 0.52 | ISOOLEFIN/CYCLOPARAFFIN            |        |           |
| 26.238  | 0.38 | ISOOLEFIN/CYCLOPARAFFIN            |        |           |
| 26.728  | 0.26 | ISOOLEFIN/CYCLOPARAFFIN            |        |           |
| 26.823  | 0.46 | ISOOLEFIN/CYCLOPARAFFIN            |        |           |
| 28.619  | 0.22 | DODECANE, 2,6,11-TRIMETHYL-        | 212    | C15H32    |
| 29.184  | 0.92 | ISOOLEFIN/CYCLOPARAFFIN            |        |           |
| 29.344  | 0.41 | ISOOLEFIN/CYCLOPARAFFIN            |        |           |
| 29.484  | 0.57 | PENTADECANE                        | 212    | C15H32    |
| 29.589  | 0.25 | ISOOLEFIN/CYCLOPARAFFIN            |        |           |
| 29.714  | 0.40 | ISOOLEFIN/CYCLOPARAFFIN            |        |           |
| 29.859  | 1.50 | ISOOLEFIN/CYCLOPARAFFIN            |        |           |
| 30.054  | 1.21 | ISOOLEFIN/CYCLOPARAFFIN            |        |           |
| 30.184  | 0.48 | ISOOLEFIN/CYCLOPARAFFIN            |        |           |
| 30.399  | 1.27 | ISOOLEFIN/CYCLOPARAFFIN            |        |           |
| 30.605  | 1.13 | ISOOLEFIN/CYCLOPARAFFIN            |        |           |
| 31.25   | 0.54 | ISOOLEFIN/CYCLOPARAFFIN            |        |           |
| 31.44   | 0.36 | HEXADECANE                         | 226    | C16H34    |

|        |      |                         |     |        |
|--------|------|-------------------------|-----|--------|
| 33.181 | 0.27 | ISOOLEFIN/CYCLOPARAFFIN |     |        |
| 33.251 | 1.25 | ISOOLEFIN/CYCLOPARAFFIN |     |        |
| 33.386 | 0.31 | ISOOLEFIN/CYCLOPARAFFIN |     |        |
| 33.696 | 0.98 | ISOOLEFIN/CYCLOPARAFFIN |     |        |
| 33.856 | 2.31 | ISOOLEFIN/CYCLOPARAFFIN |     |        |
| 34.021 | 0.73 | ISOOLEFIN/CYCLOPARAFFIN |     |        |
| 34.361 | 2.20 | ISOOLEFIN/CYCLOPARAFFIN |     |        |
| 34.431 | 0.79 | ISOOLEFIN/CYCLOPARAFFIN |     |        |
| 34.526 | 0.83 | ISOOLEFIN/CYCLOPARAFFIN |     |        |
| 34.921 | 1.22 | ISOOLEFIN/CYCLOPARAFFIN |     |        |
| 35.056 | 0.52 | OCTADECANE              | 254 | C18H38 |
| 35.116 | 0.51 | ISOOLEFIN/CYCLOPARAFFIN |     |        |
| 36.732 | 0.36 | ISOOLEFIN/CYCLOPARAFFIN |     |        |
| 36.857 | 0.52 | ISOOLEFIN/CYCLOPARAFFIN |     |        |
| 37.097 | 0.12 | ISOOLEFIN/CYCLOPARAFFIN |     |        |
| 37.412 | 0.91 | ISOOLEFIN/CYCLOPARAFFIN |     |        |
| 37.482 | 0.36 | NONADECANE              | 268 | C19H40 |
| 37.537 | 0.27 | ISOOLEFIN/CYCLOPARAFFIN |     |        |
| 37.837 | 0.41 | ISOOLEFIN/CYCLOPARAFFIN |     |        |
| 37.973 | 0.44 | ISOOLEFIN/CYCLOPARAFFIN |     |        |
| 38.028 | 0.74 | ISOOLEFIN/CYCLOPARAFFIN |     |        |
| 38.263 | 0.26 | ISOOLEFIN/CYCLOPARAFFIN |     |        |
| 38.323 | 0.35 | EICOSANE                | 282 | C20H42 |
| 38.573 | 0.54 | ISOOLEFIN/CYCLOPARAFFIN |     |        |
| 39.763 | 0.17 | ISOOLEFIN/CYCLOPARAFFIN |     |        |
| 39.848 | 0.36 | HENEICOSANE             | 296 | C21H44 |
| 40.113 | 0.40 | ISOOLEFIN/CYCLOPARAFFIN |     |        |
| 40.479 | 0.22 | ISOOLEFIN/CYCLOPARAFFIN |     |        |
| 40.629 | 0.65 | ISOOLEFIN/CYCLOPARAFFIN |     |        |
| 40.684 | 0.50 | ISOOLEFIN/CYCLOPARAFFIN |     |        |
| 40.989 | 0.63 | ISOOLEFIN/CYCLOPARAFFIN |     |        |
| 41.109 | 0.52 | ISOOLEFIN/CYCLOPARAFFIN |     |        |
| 41.189 | 0.72 | ISOOLEFIN/CYCLOPARAFFIN |     |        |
| 41.239 | 0.54 | ISOOLEFIN/CYCLOPARAFFIN |     |        |
| 41.309 | 0.62 | DOCOSANE                | 310 | C22H46 |
| 41.604 | 0.20 | ISOOLEFIN/CYCLOPARAFFIN |     |        |
| 41.694 | 0.64 | ISOOLEFIN/CYCLOPARAFFIN |     |        |
| 42.199 | 0.12 | ISOOLEFIN/CYCLOPARAFFIN |     |        |
| 42.649 | 0.17 | 1-DOCOSENE              | 308 | C22H44 |
| 42.709 | 0.39 | TRICOSANE               | 324 | C23H48 |
| 43.495 | 0.21 | ISOOLEFIN/CYCLOPARAFFIN |     |        |
| 43.58  | 0.51 | ISOOLEFIN/CYCLOPARAFFIN |     |        |
| 43.66  | 0.18 | ISOOLEFIN/CYCLOPARAFFIN |     |        |
| 43.985 | 0.39 | ISOOLEFIN/CYCLOPARAFFIN |     |        |
| 44.065 | 0.94 | ISOOLEFIN/CYCLOPARAFFIN |     |        |
| 44.16  | 0.23 | ISOOLEFIN/CYCLOPARAFFIN |     |        |
| 44.485 | 0.23 | ISOOLEFIN/CYCLOPARAFFIN |     |        |
| 44.56  | 0.24 | ISOOLEFIN/CYCLOPARAFFIN |     |        |
| 45.351 | 0.21 | PENTACOSANE             | 352 | C25H52 |
| 45.791 | 0.15 | ISOOLEFIN/CYCLOPARAFFIN |     |        |
| 46.171 | 0.26 | ISOOLEFIN/CYCLOPARAFFIN |     |        |
| 46.261 | 0.50 | ISOOLEFIN/CYCLOPARAFFIN |     |        |
| 46.346 | 0.24 | ISOOLEFIN/CYCLOPARAFFIN |     |        |
| 46.541 | 0.28 | ISOOLEFIN/CYCLOPARAFFIN |     |        |
| 46.611 | 0.53 | HEXACOSANE              | 366 | C26H54 |

|        |       |                         |     |        |
|--------|-------|-------------------------|-----|--------|
| 46.731 | 0.50  | ISOOLEFIN/CYCLOPARAFFIN |     |        |
| 47.086 | 0.21  | ISOOLEFIN/CYCLOPARAFFIN |     |        |
| 47.186 | 0.24  | ISOOLEFIN/CYCLOPARAFFIN |     |        |
| 47.812 | 0.22  | HEPTACOSANE             | 380 | C27H56 |
| 48.302 | 0.10  | ISOOLEFIN/CYCLOPARAFFIN |     |        |
| 48.642 | 0.14  | ISOOLEFIN/CYCLOPARAFFIN |     |        |
| 48.737 | 0.30  | ISOOLEFIN/CYCLOPARAFFIN |     |        |
| 49.182 | 0.31  | ISOOLEFIN/CYCLOPARAFFIN |     |        |
| 50.112 | 0.10  | NONACOSANE              | 408 | C29H60 |
| 51.473 | 0.14  | ISOOLEFIN/CYCLOPARAFFIN |     |        |
|        | 4.59  | N-PARAFFINS             |     |        |
|        | 0.17  | N-OLEFINS               |     |        |
|        | 3.77  | ISO-PARAFFINS           |     |        |
|        |       | ISO-OLEFINS             |     |        |
|        | 87.06 | CYCLO-PARAFFINS         |     |        |
|        | 0.17  | CYCLO-OLEFINS           |     |        |
|        | 4.25  | AROMATICS               |     |        |

Table S10. PE/PP/PS/PET/PVC 47.5/47.5/3/1/1 cracking product detailed composition (Sample 10).

| RT, min | %wt. | Component name                                            | MW, Da | Structure |
|---------|------|-----------------------------------------------------------|--------|-----------|
| 3.204   | 1.78 | 1-HEPTENE                                                 | 98     | C7H14     |
| 3.324   | 2.31 | HEPTANE                                                   | 100    | C7H16     |
| 4.839   | 4.16 | TOLUENE                                                   | 92     | C7H8      |
| 5.665   | 1.48 | 1-OCTENE                                                  | 112    | C8H16     |
| 5.99    | 2.01 | OCTANE                                                    | 114    | C8H18     |
| 7.56    | 0.87 | CYCLOHEXANE, 1,3,5-TRIMETHYL-, (1.ALPHA, 3.ALPHA,5.BETA)- | 126    | C9H18     |
| 7.66    | 0.90 | 2,3-DIMETHYL-2-HEPTENE                                    | 126    | C9H18     |
| 8.036   | 7.06 | 2,4-DIMETHYL-1-HEPTENE                                    | 126    | C9H18     |
| 8.991   | 1.09 | CYCLOHEXANE, 1,3,5-TRIMETHYL-                             | 126    | C9H18     |
| 11.542  | 0.96 | 1-NONENE                                                  | 126    | C9H18     |
| 11.667  | 0.86 | 1-UNDECENE, 8-METHYL-                                     | 168    | C12H24    |
| 12.027  | 1.69 | NONANE                                                    | 128    | C9H20     |
| 16.324  | 1.90 | 1-DECENE                                                  | 140    | C10H20    |
| 16.644  | 2.02 | DECANE                                                    | 142    | C10H22    |
| 16.944  | 1.31 | NONANE, 2,6-DIMETHYL-                                     | 156    | C11H24    |
| 17.099  | 1.46 | OCTANE, 2,3,7-TRIMETHYL-                                  | 156    | C11H24    |
| 19.29   | 2.41 | 2-DECENE, 2,4-DIMETHYL-                                   | 168    | C12H24    |
| 19.425  | 1.95 | 1-DECENE, 2,4-DIMEYTHYL-                                  | 168    | C12H24    |
| 19.735  | 1.82 | 1-UNDECENE                                                | 154    | C11H22    |
| 19.985  | 2.28 | UNDECANE                                                  | 156    | C11H24    |
| 22.531  | 1.72 | 1-DODECENE                                                | 168    | C12H24    |
| 22.736  | 2.24 | DODECANE                                                  | 170    | C12H26    |
| 24.992  | 1.53 | 1-TRIDECENE                                               | 182    | C13H26    |
| 25.177  | 2.09 | TRIDECANE                                                 | 184    | C13H28    |
| 25.237  | 3.55 | 1-UNDECENE, 7-METHYL-                                     | 168    | C12H24    |
| 25.432  | 1.66 | ISOOLEFIN/CYCLOPARAFFIN                                   |        |           |
| 25.622  | 2.89 | ISOOLEFIN/CYCLOPARAFFIN                                   |        |           |
| 27.243  | 1.53 | 1-TETRADECENE                                             | 196    | C14H28    |
| 27.403  | 2.05 | TETRADECANE                                               | 198    | C14H30    |
| 29.339  | 1.30 | 1-PENTADECENE                                             | 210    | C15H30    |
| 29.484  | 2.19 | PENTADECANE                                               | 212    | C15H32    |
| 29.859  | 1.24 | ISOOLEFIN/CYCLOPARAFFIN                                   |        |           |
| 30.049  | 0.67 | ISOOLEFIN/CYCLOPARAFFIN                                   |        |           |

|        |       |                                       |     |        |
|--------|-------|---------------------------------------|-----|--------|
| 30.399 | 0.76  | ISOOLEFIN/CYCLOPARAFFIN               |     |        |
| 30.604 | 0.67  | ISOOLEFIN/CYCLOPARAFFIN               |     |        |
| 31.31  | 1.18  | CETENE                                | 224 | C16H32 |
| 31.44  | 2.13  | HEXADECANE                            | 226 | C16H34 |
| 33.17  | 0.97  | 1-HEPTADECENE                         | 238 | C17H34 |
| 33.296 | 1.96  | HEPTADECANE                           | 240 | C17H36 |
| 33.846 | 2.30  | BENZENE, 1,1'-(2-BUTENE-1,4-DIYL)BIS- | 208 | C16H16 |
| 34.356 | 1.06  | ISOOLEFIN/CYCLOPARAFFIN               |     |        |
| 34.936 | 1.36  | 3-OCTADECENE, (E)-                    | 252 | C18H36 |
| 35.051 | 1.88  | OCTADECANE                            | 254 | C18H38 |
| 36.627 | 0.96  | 1-NONADECENE                          | 266 | C19H38 |
| 36.727 | 1.93  | NONADECANE                            | 268 | C19H40 |
| 37.412 | 1.00  | ISOOLEFIN/CYCLOPARAFFIN               |     |        |
| 38.232 | 0.86  | 3-EICOSENE, (E)-                      | 280 | C20H40 |
| 38.323 | 1.79  | EICOSANE                              | 282 | C20H42 |
| 39.768 | 0.71  | 3-HENEICOSENE, (E)-                   | 294 | C21H42 |
| 39.848 | 1.76  | HENEICOSANE                           | 296 | C21H44 |
| 40.628 | 0.67  | ISOOLEFIN/CYCLOPARAFFIN               |     |        |
| 41.309 | 1.65  | DOCOSANE                              | 310 | C22H46 |
| 42.709 | 1.55  | TRICOSANE                             | 324 | C23H48 |
| 43.995 | 0.67  | 9-TRICOSENE, (Z)-                     | 322 | C23H46 |
| 44.06  | 1.89  | TETRACOSANE                           | 338 | C24H50 |
| 46.601 | 1.46  | HEXACOSANE                            | 366 | C26H54 |
| 47.806 | 1.26  | HEPTACOSANE                           | 380 | C27H56 |
| 48.982 | 1.12  | OCTACOSANE                            | 394 | C28H58 |
| 50.117 | 0.83  | NONACOSANE                            | 408 | C29H60 |
| 51.223 | 0.67  | TRIACONTANE                           | 422 | C30H62 |
|        | 40.76 | N-PARAFFINS                           |     |        |
|        | 20.72 | N-OLEFINS                             |     |        |
|        | 2.77  | ISO-PARAFFINS                         |     |        |
|        |       | ISO-OLEFINS                           |     |        |
|        | 29.28 | CYCLO-PARAFFINS                       |     |        |
|        | 0.00  | CYCLO-OLEFINS                         |     |        |
|        | 6.46  | AROMATICS                             |     |        |
